# Supplementary material
Source: Springer Nature journal article supplement (https://www.springermedizin.de/resource/supplementary/12874_2013_1058_MOESM2_ESM.pdf/9433434)
Supplement: MOESM2 [file 9433434]

## **Additional file 2 - Non-Gaussian simulation study**

### **Overview**

We provide a table of important results for the simulation study assessing the robustness of the bias correction method to deviations from the Gaussian assumption. For a description of the simulation study design, refer to the Design of non-Gaussian simulation studies section in the main text.

### **Tabular Results for the Non-Gaussian Simulation Study**

Table S1 displays the effect of increasing the multinomial bin size on the Type I error rate of the *true*, *observed* and *corrected* analyses. Note that bin size is listed as a proportion of the standard deviation of the screening test scores. For example, a bin size of 1/2 indicates that Gaussian screening test scores were rounded to 1/2 the standard deviation to generate the multinomial screening test scores.

For additional information on the results of the non-Gaussian simulation studies, see the Results, Robustness to non-Gaussian data section in the main text.

**Table S1 - Effect of multinomial bin size on the Type I error rate of the *true*, *observed*, and *corrected* analyses**

| Bin Size* | Disease<br>Prevalence | True | Observed | Corrected |
|-----------|-----------------------|------|----------|-----------|
| 1/10      | 0.01                  | 0.01 | 0.05     | 0.03      |
| 1/4       | 0.01                  | 0.01 | 0.04     | 0.09      |
| 1/2       | 0.01                  | 0.01 | 0.03     | 0.13      |
| 1         | 0.01                  | 0.02 | 0.02     | 0.23      |
| 2         | 0.01                  | 0.02 | 0.09     | 0.38      |
| 1/10      | 0.14                  | 0.02 | 0.79     | 0.05      |
| 1/4       | 0.14                  | 0.02 | 0.63     | 0.20      |
| 1/2       | 0.14                  | 0.02 | 0.38     | 0.76      |
| 1         | 0.14                  | 0.02 | 0.11     | 0.98      |
| 2         | 0.14                  | 0.02 | 0.94     | 1.00      |
| 1/10      | 0.24                  | 0.02 | 0.97     | 0.05      |
| 1/4       | 0.24                  | 0.02 | 0.91     | 0.20      |
| 1/2       | 0.24                  | 0.02 | 0.68     | 0.83      |
| 1         | 0.24                  | 0.02 | 0.23     | 1.00      |
| 2         | 0.24                  | 0.03 | 1.00     | 1.00      |

\*Relative to the standard deviation of the screening test scores.
